# Supplementary material for: Protein-lipid interaction at low pH induces oligomerization of the MakA cytotoxin from Vibrio cholerae
Source: eLife journal article supplement (doi:10.7554/elife.73439), 2022-01-20

**Figure 1—Figure supplement 1B—source data 1**  
**Original Western blots for MakA.**

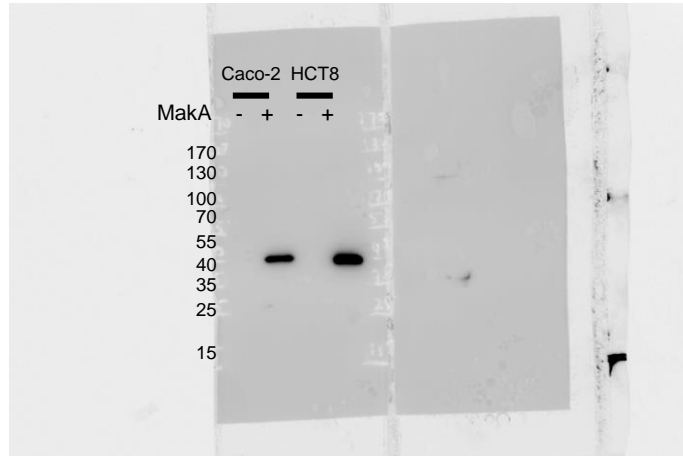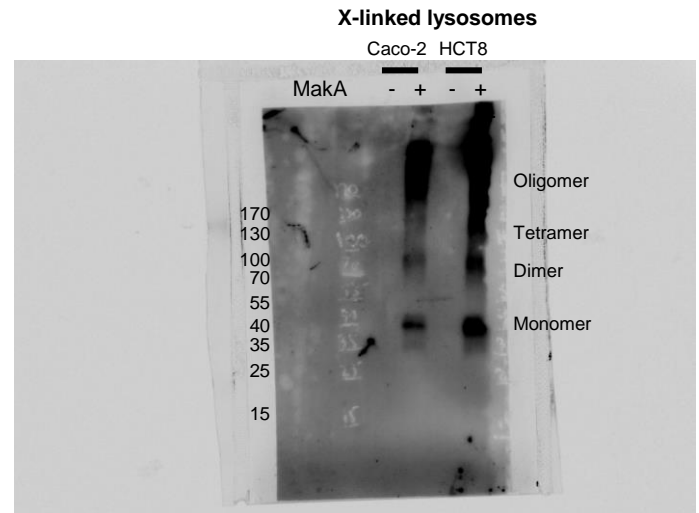

Supplement: fig1-figsupp1-data1 [file elife-73439-fig1-figsupp1-data1-v1.pdf]
