# Supplementary material for: Protein-lipid interaction at low pH induces oligomerization of the MakA cytotoxin from Vibrio cholerae
Source: eLife journal article supplement (doi:10.7554/elife.73439), 2022-01-20

# Figure 3—figure supplement 1—source data 1

## Original western blot for Figure 3—figure supplement 1A.

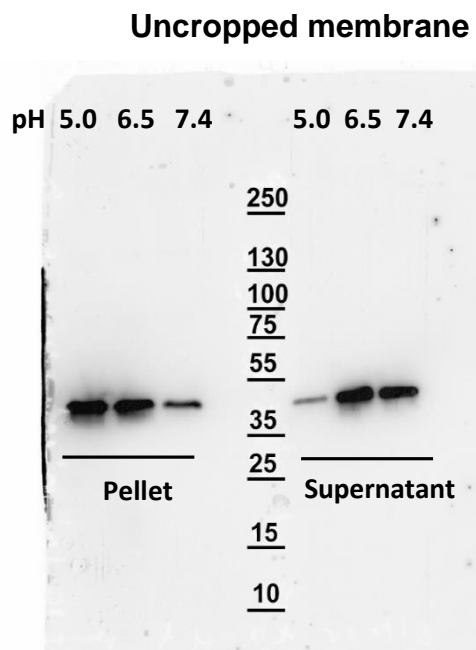

Supplement: fig3-figsupp1-data1 [file elife-73439-fig3-figsupp1-data1-v1.pdf]
