# Supplementary material for: Protein-lipid interaction at low pH induces oligomerization of the MakA cytotoxin from Vibrio cholerae
Source: eLife. 2022 Feb 8;11:e73439. doi: 10.7554/eLife.73439 (PMC8824476; doi:10.7554/eLife.73439)
Supplement: Figure 1—source data 1. [file elife-73439-fig1-data1.xlsx]

## Sheet: Sheet1
	Distance (µm)	Alexa568-MakA	GFP-LAMP1
	0	2.8333	1.5
	0.097223	4.0749	2.0634
	0.194446	10.7442	3.1528
	0.291669	17.9453	8.25
	0.388892	22.3426	18.537
	0.486108	16.8163	24.6369
	0.583331	12.3177	18.1615
	0.680554	14.7481	9.4923
	0.777777	10.0972	7.0972
	0.875	5.7747	1.9596
	0.972223	5.8328	0.2888
	1.06945	6.8895	0.6772
	1.16667	6.7083	5.625
	1.26389	11.1387	3.5246
	1.36111	9.6198	0.967
	1.45833	11.3125	4.3906
	1.55555	11.6852	1.1389
	1.65278	6.9852	5.1759
	1.75	9.8646	1.375
	1.84722	9.839	2.0201
	1.94445	18.3287	5.5787
	2.04167	23.4857	18.5729
	2.13889	21.8964	30.5718
	2.23611	22.0538	32.4366
	2.33333	17.4167	21.5833
	2.43055	8.0396	18.3278
	2.52778	7.3432	1.9942
	2.625	4.6445	1.0547
	2.72222	4.6204	0.3472
	2.81945	3.4159	0.5642
	2.91667	3.6458	2.0677
	3.01389	3.667	2.7451
	3.11111	3.8889	0.2593
	3.20833	5.474	1.1133
	3.30555	11.3333	1.7847
	3.40278	15.8142	9.1788
	3.5	39	15.2917
	3.59722	42.239	37.1415
	3.69445	32.7309	35.1198
	3.79167	25.3672	25.7812
	3.88889	17.8796	30.0324
	3.98611	12.5146	18.9909
	4.08333	11.3333	7.6354
	4.18055	8.8306	2.055
	4.27778	8.3935	2.3657
	4.375	9.0378	0.4089
	4.47222	7.9572	1.1921
	4.56945	8.5343	0.8135
	4.66667	6.8333	0.4167
