# Supplementary material for: Protein-lipid interaction at low pH induces oligomerization of the MakA cytotoxin from Vibrio cholerae
Source: eLife. 2022 Feb 8;11:e73439. doi: 10.7554/eLife.73439 (PMC8824476; doi:10.7554/eLife.73439)
Supplement: Figure 1—source data 3. [file elife-73439-fig1-data3.xlsx]

## Sheet: Sheet1
	pH5.0	pH5.5	pH6.0	pH6.5	pH7.0
	19589	7622	9624	10665	6548
	11862	8138	8934	5261	3251
	11054	6770	9629	6825	6299
	13517	7392	7939	4737	3419
	18978	12115	8193	11986	1187
	8801	7633	4766	11038	1516
	13039	5434	11988	4493	2083
	11838	3741	7470	7891	1908
	12291	6554	7843	5497	1688
	12606	10428	8716	13411	1895
	13845	5811	9469	8244	657
	11623	11211	7564	6552	1464
	13224	6241	6723	4271	2662
	11924	6334	8572	5301	811
	8897	6295	9876	2286	2070
	9330	6383	9645	2020	1028
	12015	4673	7934	3677	1271
	14364	5751	9665	9212	2054
	11138	5807	9070	7463	2334
	11494	5786	9795	7634	1784
	9097	6837	11141	8054	1408
	12245	5875	10110	3943	3523
	5556	3052	7807	7081	1519
	6584	3268	10101	4751	993
	25336	3730	11898	5922	1005
	10759	3425	14804	10676	4763
	10562	18232	13752	11090	2242
	16629	10574	12972	3584	1845
	13113	6749	11330	8862	1851
	18029	5770	9573	8515	4470
	28892	5017	13152	4874	2473
	24560	4980	12123	6527	1349
	18621	7363	6245	2076	789
	21191	6305	7304	6602	4183
	13473	9877	11650	4116	1210
	11106	20297	11381	2525	917
	12326	10874	9395	3242	2983
	9819	8645	7591	170	841
	10104	16832	15687	3253	996
	10876	6532	12661	4629	1084
	23337	19698	9093	2310	667
	11393	8095	10754	4946	757
	9115	6293	7396	477	605
	12035	4646	12552	286	1497
	7722	10650	10367	158	1296
	10488	8847	18810	5611	343
	6712	7029	10115	7642	844
	9291	7168	12164	3832	352
	9431	13286	8723	8597	1078
	12129	6146	14422	2544	809
	30917	6365	13331	10634	539
	17898	4353	15533	10190	670
	3692	5623	13312	2474	929
	5456	6522	12627	4111	679
	12599	6106	5563	3506	359
	13845	7079	9549	9700	734
	8169	8316	4378	9987	978
	6341	10801	16498	236	440
	11328	6965	17237	319	867
	10260	7272	17816	244	796
	7720	10806	12568	1581	916
	18753	5214	11786	594	3240
	7641	4113	13448	948	587
	8238	12446	4737	9412	847
	11396	11067	7380	6494	744
	17745	7599	9292	4206	1620
	8850	5358	8881	4124	638
	5531	5003	8767	5733	550
	14441	7638	5256	8385	504
	8077	6951	4093	3815	301
	8485	6458	6407	4554	678
	6284	10518	8382	3751	983
	6197	10474	9897	4620	964
	8932	6415	9839	6573	739
	9387	6360	4446	7460	1027
	20296	5667	3331	5307	1885
	19609	8916	3025	9004	841
	10768	7486	4242	13768	808
	6629	5311	3834	3556	388
	5394	13118	8634	9916	773
	5316	10602	3760	3679	672
	17313	9654	5605	8902	1372
	17126	5613	1926	9105	4836
	25310	3666	3438	7377	6888
	14677	13268	5332	5604	5356
	7898	7716	3641	8225	1551
	17404	7903	284	8083	1623
	11872	11190	5580	3621	1585
	4259	8253	8782	4004	984
	7676	5109	8001	16619	818
	2759	4784	247	7707	944
	5784	4673	10063	5176	939
	7458	5537	6218	8826	993
	8901	2186	8204	10429	1057
	4398	3029	4693	12143	753
	3998	5968	2128	7940	4559
	5627	6537	220	14756	2875
	6437	5477	125	15893	2983
	6653	24932	2122	9865	2711
	8350	17450	12774	5421	897
	5726	13898	4948	6170	826
	4234	9814	200	4934	1246
	9934	10911	4047	2652	4278
	20301	8416	131	6935	738
	14906	17140	6795	8139	3036
	20260	9654	5952	4795	1757
	14027	24178	9069	3627	975
	21573	8574	5845	14845	2651
	9528	9709	2875	9416	2290
	19561	7209	2853	13918	892
	25751	10600	4827	7637	1180
	22187	16157	13581	5325	1406
	12722	18201	10345	4558	1409
	22494	12098	3653	8782	1359
	26215	19863	3355	10697	1384
	15749	21669	9054	6398	1460
	16625	22141	3730	4627
	19643	13903		499
	20484	15425		300
		20244		490
		10559		551
		18073		3414
		28687		5677
		9976		74
		17407		6051
				5181
				3952
				2110
				9132
				6749
				315
				408
				410
				4704
				722
				2357
				7273
				5540
				7273
				5540
				6075.44
