# Supplementary material for: Protein-lipid interaction at low pH induces oligomerization of the MakA cytotoxin from Vibrio cholerae
Source: eLife. 2022 Feb 8;11:e73439. doi: 10.7554/eLife.73439 (PMC8824476; doi:10.7554/eLife.73439)
Supplement: Figure 2—figure supplement 1—source data 1. [file elife-73439-fig2-figsupp1-data1.xlsx]

## Sheet: Sheet1
HCT8 4h
	Conc. (nM)	pH 5.0			pH 5.5			pH 6.0			pH 6.5			pH 7.0			pH 7.2			pH 7.4			pH 8.0
	0	3	2	3	3	2	3	3	2	2	5	3	4	3	5	6	3	2	5	5	3	4	5	4	3
	250	20	30	23	17	21	14	10	6	8	4	9	6	4	3	5	5	3	6	4	3	4	6	5	3
	500	50	61	48	30	39	33	12	10	14	8	7	14	1	5	3	4	3	2	6	4	3	3	2	6
HCT8 24h
	Conc. (nM)	pH 5.0			pH 5.5			pH 6.0			pH 6.5			pH 7.0			pH 7.2			pH 7.4			pH 8.0
	0	3	8	12	4	3	5	3	3	5	4	2	4	3	2	4	2	3	3	3	1	5	3	2	5
	250	45	40	53	37	32	45	20	25	32	10	20	25	11	10	15	10	8	12	7	6	9	2	1	8
	500	80	67	75	73	53	67	53	45	65	25	33	43	29	23	32	20	17	23	10	15	12	3	5	6
HCT116 4h
	Conc. (nM)	pH 5.0			pH 5.5			pH 6.0			pH 6.5			pH 7.0			pH 7.2			pH 7.4			pH 8.0
	0	4	3	4	3	2	4	2	3	5	4	2	4	2	5	3	4	5	4	5	4	5	6	4	5
	250	27	35	41	23	21	30	7	10	8	3	5	2	4	5	5	5	6	3	2	5	2	4	3	5
	500	65	70	56	40	43	51	10	23	12	6	3	4	3	2	4	3	2	3	5	3	4	4	5	4
HCT116 24h
	Conc. (nM)	pH 5.0			pH 5.5			pH 6.0			pH 6.5			pH 7.0			pH 7.2			pH 7.4			pH 8.0
	0	6	15	10	5	5	12	3	3	7	3	2	5	3	4	5	2	3	5	3	2	4	2	2	3
	250	53	65	57	41	55	50	25	31	40	21	25	30	15	17	20	11	17	15	2	9	10	6	3	5
	500	71	78	83	63	71	78	50	63	70	36	43	50	24	31	43	21	25	35	10	12	17	3	2	7
CaCO2 4h
	Conc. (nM)	pH 5.0			pH 5.5			pH 6.0			pH 6.5			pH 7.0			pH 7.2			pH 7.4			pH 8.0
	0	4	3	5	3	4	4	5	3	4	4	3	5	3	2	4	3	3	3	3	4	3	3	4	2
	250	23	20	27	21	12	15	10	12	10	5	7	4	4	3	4	5	5	3	2	3	1	4	5	3
	500	50	42	40	30	37	25	15	20	10	9	6	4	5	3	4	6	3	2	4	3	4	3	5	2
CaCO2 24h
	Conc. (nM)	pH 5.0			pH 5.5			pH 6.0			pH 6.5			pH 7.0			pH 7.2			pH 7.4			pH 8.0
	0	7	4	15	6	3	5	4	3	6	3	2	2	2	5	4	2	3	5	3	2	5	1	2	5
	250	35	50	43	25	32	37	20	31	25	10	15	20	7	12	15	10	8	12	3	5	7	4	3	4
	500	78	63	70	71	54	60	42	45	53	32	40	45	21	25	32	12	17	20	8	10	12	2	1	3
