# Supplementary material for: Protein-lipid interaction at low pH induces oligomerization of the MakA cytotoxin from Vibrio cholerae
Source: eLife. 2022 Feb 8;11:e73439. doi: 10.7554/eLife.73439 (PMC8824476; doi:10.7554/eLife.73439)
Supplement: Figure 2—figure supplement 1—source data 2. [file elife-73439-fig2-figsupp1-data2.xlsx]

## Sheet: Sheet1
		Positive	Negative
	Vehicle	0	100
	MakA	76.1905	23.8095
