# Supplementary material for: Protein-lipid interaction at low pH induces oligomerization of the MakA cytotoxin from Vibrio cholerae
Source: eLife. 2022 Feb 8;11:e73439. doi: 10.7554/eLife.73439 (PMC8824476; doi:10.7554/eLife.73439)
Supplement: Figure 2—source data 2. [file elife-73439-fig2-data2.xlsx]

## Sheet: Sheet1
		Veh	Veh	Veh	Veh	Veh	Veh	MakA	MakA	MakA	MakA	MakA	MakA
		pH5.0	pH5.5	pH6.0	pH6.5	pH7.0	pH7.4	pH5.0	pH5.5	pH6.0	pH6.5	pH7.0	pH7.4
		2057.01	1467.1	1223.59	1046	1411.66	1196.37	35150.3	12292.9	5526.37	2106.26	1920.96	1528.23
		2576.41	1524.77	1864.83	1506.22	1244.71	1072.47	31745.9	15725.5	4945.48	1911.09	1580.85	1264.47
		2182.66	1413.35	1521.89	1661.63	1336.87	1183.88	31968.2	12539	5619.34	1984.6	1445.09	1434.93
