# Supplementary material for: Protein-lipid interaction at low pH induces oligomerization of the MakA cytotoxin from Vibrio cholerae
Source: eLife. 2022 Feb 8;11:e73439. doi: 10.7554/eLife.73439 (PMC8824476; doi:10.7554/eLife.73439)
Supplement: Figure 2—source data 3. [file elife-73439-fig2-data3.xlsx]

## Sheet: Sheet1
90 min
		pH 5.0						pH 6.5						pH 7.4
	0	1.07335	1.61001	1.07335	2.76496	1.38248	-0.691239	-2.89018	7.51444	-1.73412	4.45543	4.45543	2.97028	5.13308	9.69581	2.85171	2.3316	12.4352	5.4404
	250	20.9302	47.7639	37.5671	11.0599	11.7511	13.1336	-2.89018	2.89016	0.57804	15.5941	19.3069	2.97028	-3.42205	10.2662	0.570347	10.1036	6.21763	4.66319
	500	104.114	97.1378	102.504	108.525	88.4793	79.4931	-0.578027	-1.73412	3.4682	11.8812	6.68316	5.19802	6.27376	0.570347	2.85171	13.9896	6.21763	7.77203
	1000	98.7478	94.4544	104.651	102.304	107.143	101.613	-2.31214	5.78035	-0.578027	3.45621	6.91245	6.91245	6.27376	1.14068	2.28136	10.396	6.68316	3.71287
5 h
		pH 5.0						pH 6.5						pH 7.4
	0	12.2951	16.8618	29.1569	7.38137	6.32689	4.21792	4.27047	4.27047	3.73665	3.26798	-4.41516e-06	3.92156	1.12783	3.94737	5.07518	-2.22224	-1.48148	2.96295
	250	40.3981	47.0726	51.6393	50.6151	34.2706	50.6151	2.13524	6.93951	8.00713	3.92156	1.30718	5.88235	7.33084	4.51128	6.20302	-5.00385e-06	0.740748	3.70371
	500	98.3607	93.0913	99.7658	107.557	107.557	105.975	9.60854	14.4128	24.5552	28.1046	15.6863	22.8758	3.94737	4.51128	5.07518	0.740748	3.70371	2.22223
	1000	98.712	102.225	101.522	110.193	112.302	90.1582	29.8932	44.8399	61.9217	47.0588	35.9477	37.9085	3.94737	6.20302	6.20302	1.48147	8.8889	20.7407
