# Supplementary material for: Protein-lipid interaction at low pH induces oligomerization of the MakA cytotoxin from Vibrio cholerae
Source: eLife. 2022 Feb 8;11:e73439. doi: 10.7554/eLife.73439 (PMC8824476; doi:10.7554/eLife.73439)
Supplement: Figure 3—source data 1. [file elife-73439-fig3-data1.xlsx]

## Sheet: Sheet1
	MakA_pH 5	MakA_pH 6,5	MakA_pH 7,4		MakA+ECLE_pH 5	MakA+ECLE_pH 6,5	MakA+ECLE_pH 7,4
260	-3.4e-06	-3e-06	0		0	3.8e-06	1e-06
259.5	0.021103	-0.024216	-0.05539		0.048232	0.0204696	-0.010668
259	0.003709	0.011328	-0.07611		0.063351	0.0177171	0.0608658
258.5	0.0298691	0.017508	-0.07402		0.08277	-0.017305	0.0640463
258	-0.0081114	0.016692	-0.05362		0.057903	-0.040338	0.0870043
257.5	-0.0365099	0.032541	-0.03908		0.073183	-0.0131199	0.040391
257	-0.0159169	0.044011	-0.05767		0.02528	0.0015033	0.004914
256.5	0.0310211	0.108559	-0.04516		0.005981	0.0185186	0.004009
256	-0.0012967	0.059082	-0.06507		0.026597	0.0339042	-0.024689
255.5	-0.0023965	0.010356	-0.07614		0.028783	-0.0101284	-0.079525
255	-0.0331916	-0.055124	-0.07159		-0.009179	0.0123539	-0.090194
254.5	-0.0364225	-0.049477	-0.08382		-0.018265	0.0116192	-0.072703
254	-0.0245795	-0.03973	-0.08961		-0.031334	0.0106607	-0.051126
253.5	0.0199034	-0.051937	-0.08135		-0.088124	-0.0206218	-0.042913
253	0.0119796	-0.071139	-0.08296		-0.147306	-0.034458	-0.098716
252.5	-0.0339578	-0.080546	-0.1066		-0.184902	-0.107797	-0.120959
252	-0.09983	-0.02915	-0.14146		-0.220808	-0.044967	-0.161074
251.5	-0.112463	-0.042963	-0.22834		-0.237747	-0.039323	-0.153992
251	-0.103563	-0.036689	-0.25818		-0.287417	-0.069528	-0.123634
250.5	-0.150466	-0.092785	-0.28542		-0.351791	-0.089056	-0.116102
250	-0.192342	-0.134449	-0.29284		-0.418488	-0.205758	-0.117603
249.5	-0.211834	-0.153231	-0.31507		-0.49639	-0.251851	-0.163703
249	-0.216942	-0.191408	-0.3683		-0.61066	-0.288005	-0.201898
248.5	-0.189838	-0.221509	-0.43376		-0.64515	-0.333379	-0.223287
248	-0.210909	-0.232619	-0.46948		-0.67592	-0.359645	-0.291338
247.5	-0.251181	-0.295509	-0.52159		-0.67811	-0.430427	-0.332964
247	-0.331149	-0.329923	-0.56948		-0.73875	-0.404339	-0.405234
246.5	-0.341917	-0.400331	-0.60868		-0.91426	-0.417933	-0.501478
246	-0.377265	-0.485906	-0.70257		-1.05364	-0.463428	-0.555501
245.5	-0.34765	-0.56639	-0.76846		-1.20032	-0.597094	-0.667785
245	-0.438009	-0.644547	-0.88309		-1.30456	-0.76695	-0.683608
244.5	-0.600938	-0.79538	-0.98974		-1.43141	-0.899445	-0.801148
244	-0.75317	-0.89887	-1.12353		-1.59857	-0.98605	-0.95531
243.5	-0.92062	-1.08393	-1.26361		-1.80418	-1.06008	-1.12095
243	-1.03218	-1.24537	-1.37552		-2.02348	-1.16772	-1.33374
242.5	-1.15197	-1.46705	-1.53006		-2.30384	-1.4459	-1.46617
242	-1.29659	-1.60161	-1.73634		-2.57182	-1.65652	-1.60602
241.5	-1.49258	-1.7657	-1.94533		-2.85051	-1.91303	-1.82205
241	-1.72512	-1.96205	-2.17511		-3.1475	-2.1981	-2.04198
240.5	-2.03353	-2.22484	-2.46615		-3.45608	-2.48732	-2.36904
240	-2.34022	-2.5244	-2.78907		-3.82591	-2.77281	-2.7151
239.5	-2.66959	-2.86724	-3.20354		-4.27452	-3.08368	-3.01354
239	-2.9727	-3.22104	-3.5559		-4.77324	-3.43683	-3.29753
238.5	-3.24611	-3.61687	-3.94181		-5.23458	-3.84574	-3.6219
238	-3.57903	-4.02837	-4.33516		-5.81935	-4.27571	-4.06693
237.5	-3.92798	-4.48322	-4.82758		-6.35563	-4.708	-4.54519
237	-4.2999	-4.97592	-5.27194		-6.96606	-5.21552	-5.1186
236.5	-4.755	-5.55379	-5.78025		-7.59374	-5.72366	-5.64298
236	-5.24824	-6.06946	-6.32624		-8.22745	-6.37122	-6.15097
235.5	-5.80936	-6.72885	-6.92062		-8.88058	-6.93373	-6.72811
235	-6.33473	-7.33835	-7.55817		-9.59517	-7.58499	-7.37912
234.5	-6.8923	-7.93265	-8.12609		-10.291	-8.22549	-8.02779
234	-7.4959	-8.60362	-8.78372		-11.0086	-8.87401	-8.68066
233.5	-8.05271	-9.17654	-9.46577		-11.7422	-9.55572	-9.30944
233	-8.63676	-9.82136	-10.1187		-12.5189	-10.2432	-9.90692
232.5	-9.22666	-10.4371	-10.8354		-13.3584	-10.9291	-10.6387
232	-9.78202	-11.1237	-11.5248		-14.1296	-11.7041	-11.3153
231.5	-10.2974	-11.6931	-12.1798		-14.9002	-12.3854	-11.9917
231	-10.8721	-12.4412	-12.8134		-15.6314	-13.2584	-12.6847
230.5	-11.4521	-13.1115	-13.472		-16.4622	-13.9195	-13.4249
230	-12.0725	-13.8964	-14.1453		-17.1528	-14.5923	-14.1074
229.5	-12.7164	-14.6322	-14.9535		-17.841	-15.201	-14.8088
229	-13.354	-15.2975	-15.6765		-18.4547	-15.9624	-15.4598
228.5	-13.9752	-16.0045	-16.4154		-19.0778	-16.644	-16.2122
228	-14.6075	-16.7237	-17.0883		-19.602	-17.3087	-16.8978
227.5	-15.2661	-17.4261	-17.7718		-20.3199	-18.0016	-17.6912
227	-15.9246	-18.0774	-18.4716		-20.8893	-18.6769	-18.2734
226.5	-16.4814	-18.7322	-19.1136		-21.3634	-19.2461	-18.9662
226	-16.9558	-19.2688	-19.648		-21.7678	-19.8171	-19.539
225.5	-17.3965	-19.8415	-20.2583		-22.0831	-20.1987	-20.1413
225	-17.8013	-20.3483	-20.7583		-22.4017	-20.6223	-20.6479
224.5	-18.2254	-20.7741	-21.2423		-22.5981	-20.9259	-21.1063
224	-18.4699	-21.1998	-21.5835		-22.7521	-21.2864	-21.5273
223.5	-18.7432	-21.5851	-21.9485		-22.7591	-21.6846	-21.8081
223	-18.9477	-21.9218	-22.2708		-22.7429	-21.9047	-22.1906
222.5	-19.1477	-22.1755	-22.5254		-22.5394	-22.0134	-22.4292
222	-19.3131	-22.3307	-22.6796		-22.3918	-22.1408	-22.5914
221.5	-19.3537	-22.42	-22.8395		-22.211	-22.1637	-22.7664
221	-19.4303	-22.4183	-22.9366		-22.0016	-22.1556	-22.7962
220.5	-19.4274	-22.3995	-22.9292		-21.6934	-21.9639	-22.9361
220	-19.3911	-22.4188	-22.9633		-21.32	-21.8043	-22.8957
219.5	-19.295	-22.3572	-22.9722		-20.8607	-21.6798	-22.8444
219	-19.163	-22.2529	-22.9976		-20.521	-21.5231	-22.7376
218.5	-19.0319	-22.1704	-22.8616		-20.0611	-21.3842	-22.6219
218	-18.9262	-21.9853	-22.672		-19.7327	-21.1212	-22.3594
217.5	-18.8189	-21.9153	-22.4653		-19.2178	-20.9296	-22.2298
217	-18.7156	-21.7725	-22.3151		-18.8064	-20.7817	-22.1139
216.5	-18.593	-21.6474	-22.2789		-18.5097	-20.4882	-22.1616
216	-18.4551	-21.4554	-22.1423		-18.0641	-20.332	-22.0789
215.5	-18.237	-21.3816	-22.0649		-17.5751	-20.2149	-22.0313
215	-18.2521	-21.1206	-21.9258		-17.153	-20.06	-21.8031
214.5	-18.0782	-20.9747	-21.808		-16.5721	-19.9627	-21.5818
214	-18.1898	-20.8474	-21.8561		-16.2324	-19.7889	-21.4975
213.5	-18.1622	-20.9553	-21.8928		-15.8737	-19.6333	-21.5371
213	-18.2052	-21.0722	-21.9679		-15.6014	-19.6074	-21.4942
212.5	-18.2073	-21.2715	-22.04		-15.3887	-19.6647	-21.5552
212	-18.26	-21.3582	-22.1991		-15.1393	-19.7371	-21.6512
211.5	-18.3765	-21.5021	-22.2792		-14.9798	-19.9371	-21.8345
211	-18.5055	-21.6159	-22.3823		-14.6754	-19.9882	-21.9781
210.5	-18.5591	-21.7586	-22.6025		-14.3732	-20.0542	-22.0292
210	-18.6995	-22.1475	-22.769		-13.8941	-19.9801	-21.9503
209.5	-18.8431	-22.291	-23.009		-13.3442	-19.9434	-22.082
209	-18.9382	-22.4474	-23.1405		-12.5585	-19.6549	-22.1707
208.5	-18.788	-22.2963	-23.1472		-11.6004	-19.4874	-22.4251
208	-18.5036	-21.8152	-22.8517		-10.3901	-19.0947	-22.1553
207.5	-17.9868	-21.2839	-22.2368		-8.94474	-18.298	-21.3794
207	-17.2646	-20.3774	-21.3068		-7.46841	-17.4646	-20.7001
206.5	-16.3471	-19.4916	-20.1452		-5.65568	-16.0327	-19.8379
206	-15.3486	-18.2094	-18.8688		-3.63848	-14.6334	-18.5671
205.5	-14.1545	-16.5915	-17.4936		-1.4242	-13.044	-16.9861
205	-12.6603	-14.982	-15.989		1.16303	-10.8823	-15.1716
204.5	-11.067	-13.1888	-14.2396		3.61152	-8.73304	-13.3607
204	-9.22265	-11.0903	-12.3891		6.41791	-6.15654	-11.7946
203.5	-7.34935	-9.21227	-10.2541		8.93904	-3.6698	-9.52088
203	-5.10947	-6.85491	-7.80563		11.6929	-1.29183	-6.7134
202.5	-2.70026	-4.03584	-5.36384		14.8714	0.929217	-3.79657
202	-0.462573	-1.16527	-2.71203		18.1033	3.36475	-0.99993
201.5	2.09066	1.97294	0.212741		20.976	6.01574	1.15091
201	4.6833	4.84855	3.4777		24.0905	9.15285	3.5069
200.5	7.57195	7.9437	6.78964		27.6974	13.1646	6.69398
200	10.7052	11.317	10.7852		30.9434	17.3981	10.3847
199.5	13.7817	14.6344	14.1619		34.3602	20.5449	13.337
199	17.1485	18.403	17.6313		36.9909	24.0829	15.5013
198.5	20.3504	22.4913	20.9335		39.6438	28.3367	18.4089
198	23.4377	26.5144	24.4966		42.5512	31.697	19.8676
197.5	26.4351	30.6809	28.6086		45.1238	34.1525	24.0312
197	29.3486	34.3432	32.4271		47.7013	34.1461	26.2875
196.5	32.152	37.4796	35.7875		48.943	34.5166	28.5141
196	34.6314	39.8454	38.0767		49.931	37.3201	26.7489
195.5	37.1155	42.2786	39.6674		49.675	37.502	23.6722
195	38.7527	44.5793	41.432		49.6711	37.0288	22.0804
194.5	40.7133	46.3535	42.7912		49.9651	29.9207	15.8336
194	41.9563	46.9209	44.431		47.7726	18.3747	9.24684
193.5	42.766	46.7732	45.4622		46.2407	10.6171	3.64864
193	43.3639	47.1392	43.6527		40.3464	8.12045	-1.23211
192.5	42.9686	44.3355	41.4277		31.6648	4.93174	-3.69485
192	41.9939	40.1389	39.8477		22.8249	7.34274	-3.50038
191.5	40.8472	37.3398	38.0856		9.47491	2.99159	-4.47806
191	38.3155	29.5027	28.7193		6.56958	2.75503	-5.04291
190.5	34.8359	23.0671	19.2075		-2.60369	-3.01212	-2.03727
190	27.4483	12.9156	4.98626		-3.80102	-1.81696	-2.14435
